# Supplementary material for: Revealing the binding modes and the unbinding of 14-3-3σ proteins and inhibitors by computational methods
Source: PubMed Central journal article supplement (PMC4644958; doi:10.1038/srep16481), 2015-11-16
Supplement: srep16481-s1.pdf [file srep16481-s1.pdf]

# Revealing the binding modes and the unbinding of 14-3-3 $\sigma$ proteins and inhibitors by computational methods

Guodong Hu<sup>1</sup>, Zanxia Cao<sup>1</sup>, Shicai Xu<sup>1</sup>, Wei Wang<sup>2, \*</sup>, Jihua Wang<sup>1, \*</sup>

<sup>1</sup> Shandong Provincial Key Laboratory of Functional Macromolecular Biophysics and College of Physics and Electronic Information, Dezhou University, Dezhou, 253023, China;

<sup>2</sup> National Laboratory of Solid State Microstructure and Department of Physics, Nanjing University, Nanjing, 210093, China

Authors to whom correspondence should be addressed; E-Mail: wangwei@nju.edu.cn; (W. W.) jhw25336@126.com (J. W.); Tel.: +86-534-8985879; Fax: +86-534-8985884.

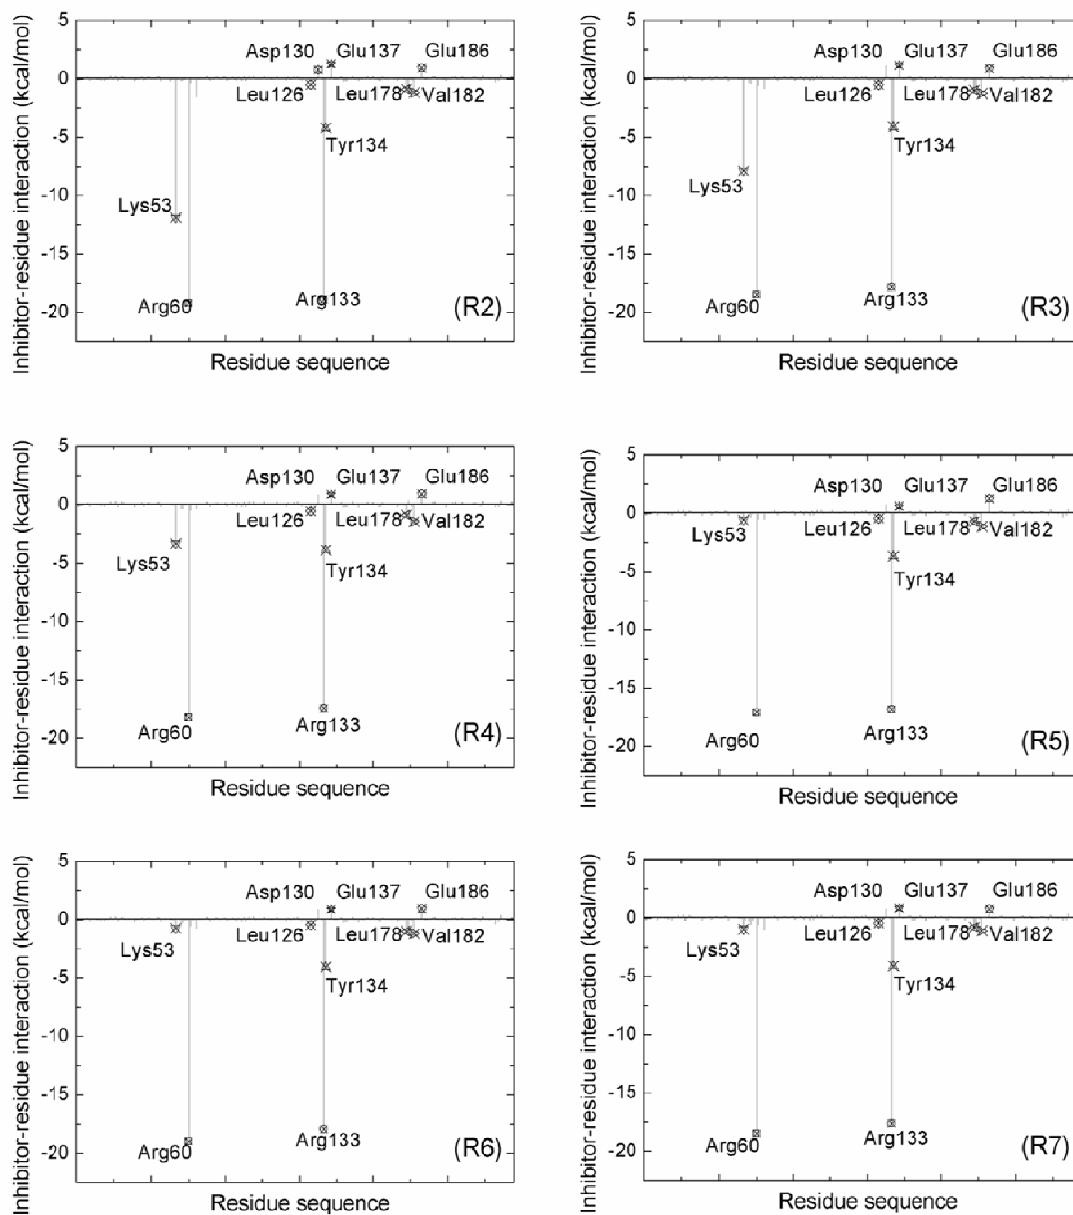

Figure S1. Decomposition of on a per-residue basis for the compounds R2- R7.

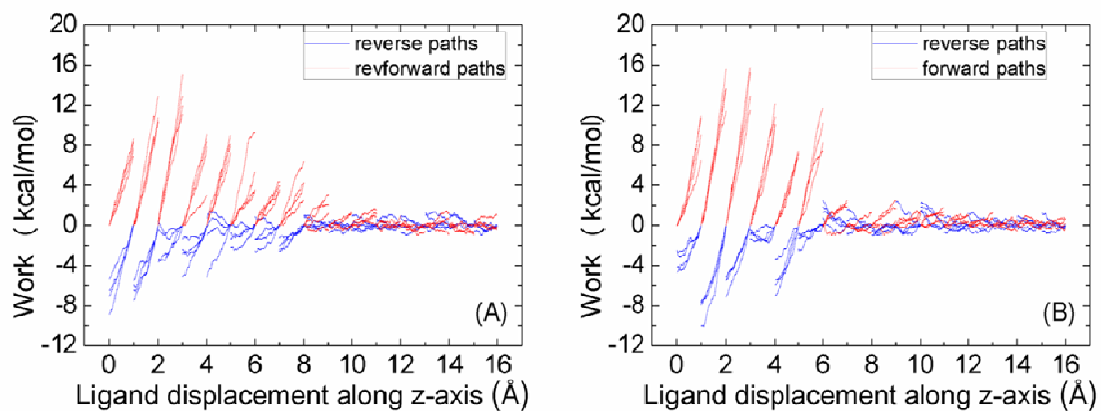

Figure S2. Plots A and B are the work done along the forward and reverse pulling paths for compound R1 and R8, respectively. In the forward direction, the atoms of a inhibitor were pulled away from the binding site. In the reverse direction, the atoms of a inhibitor were pulled back to the binding site.
